# Supplementary material
Source: MDPI journal article supplement (https://www.mdpi.com/2073-4433/13/10/1701)
Supplement: s1 [file s1]

### Supplementary Materials

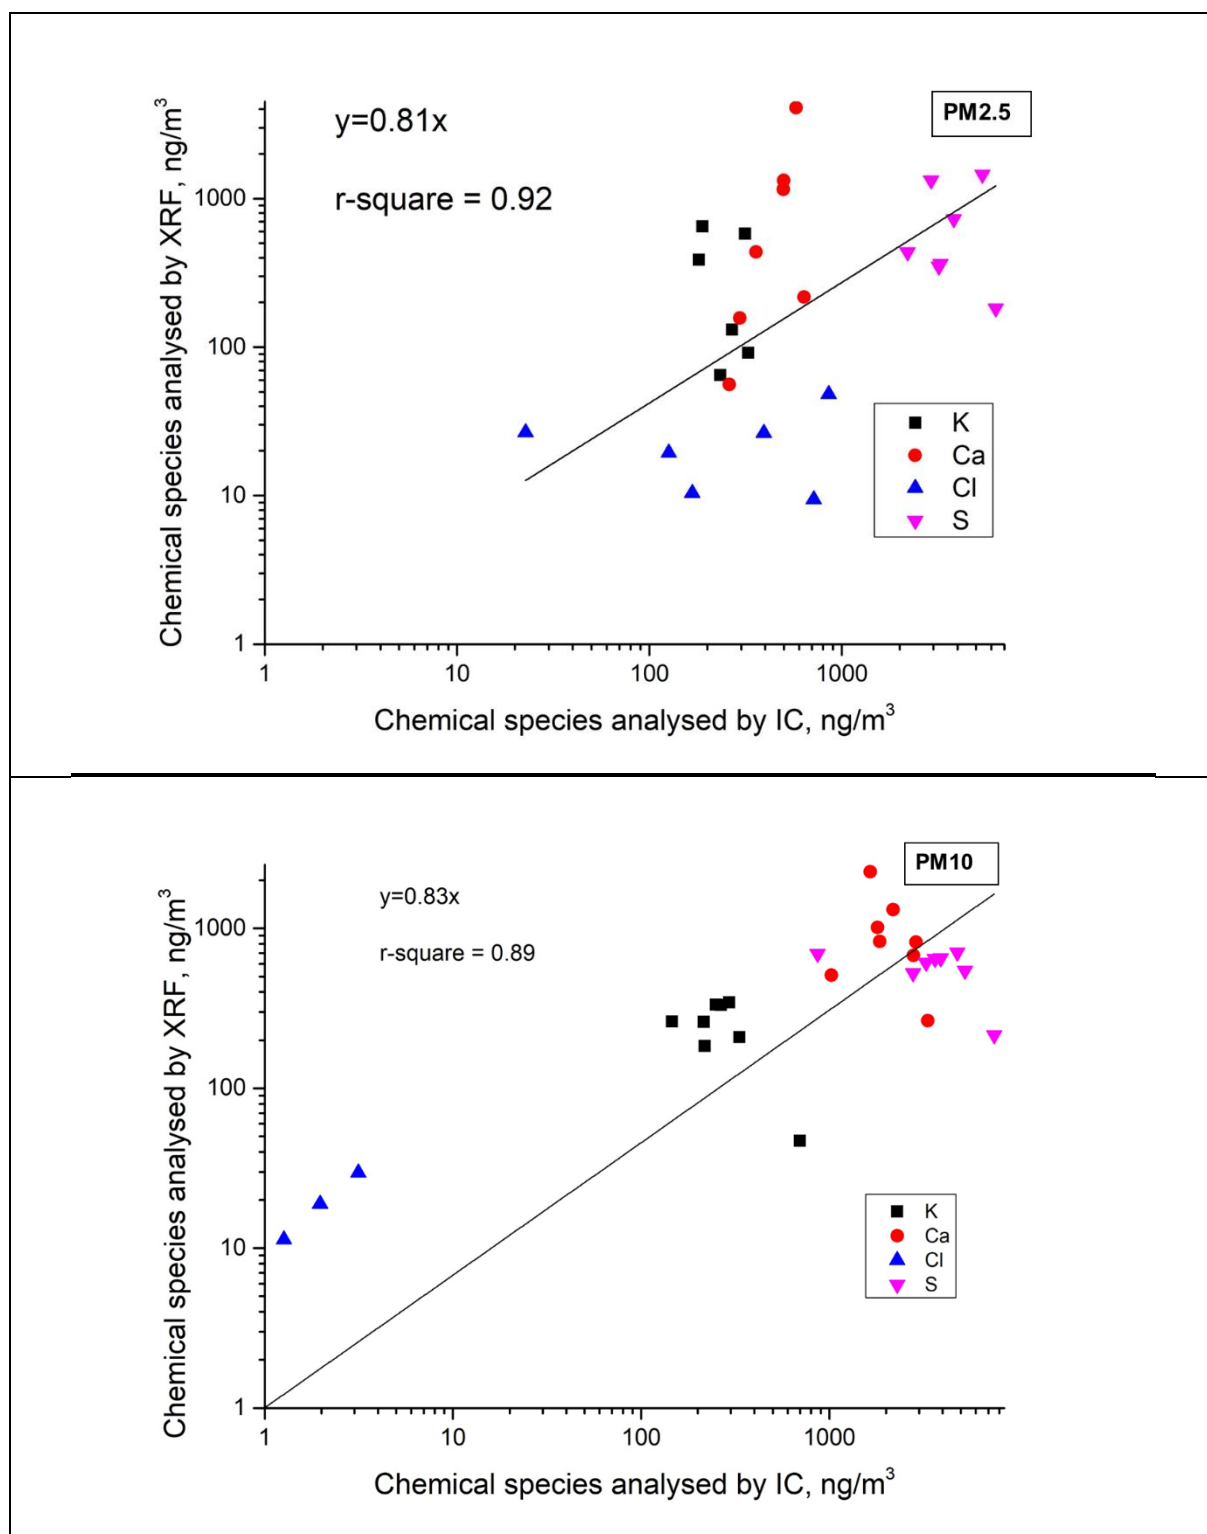

**Figure S1.** Inter-comparison between Ion-Chromatography (for water-soluble ions) and X-ray Fluorescence (for the total elements) in PM<sub>2.5</sub> (upper panel) and PM<sub>10</sub> (bottom panel) fractions.

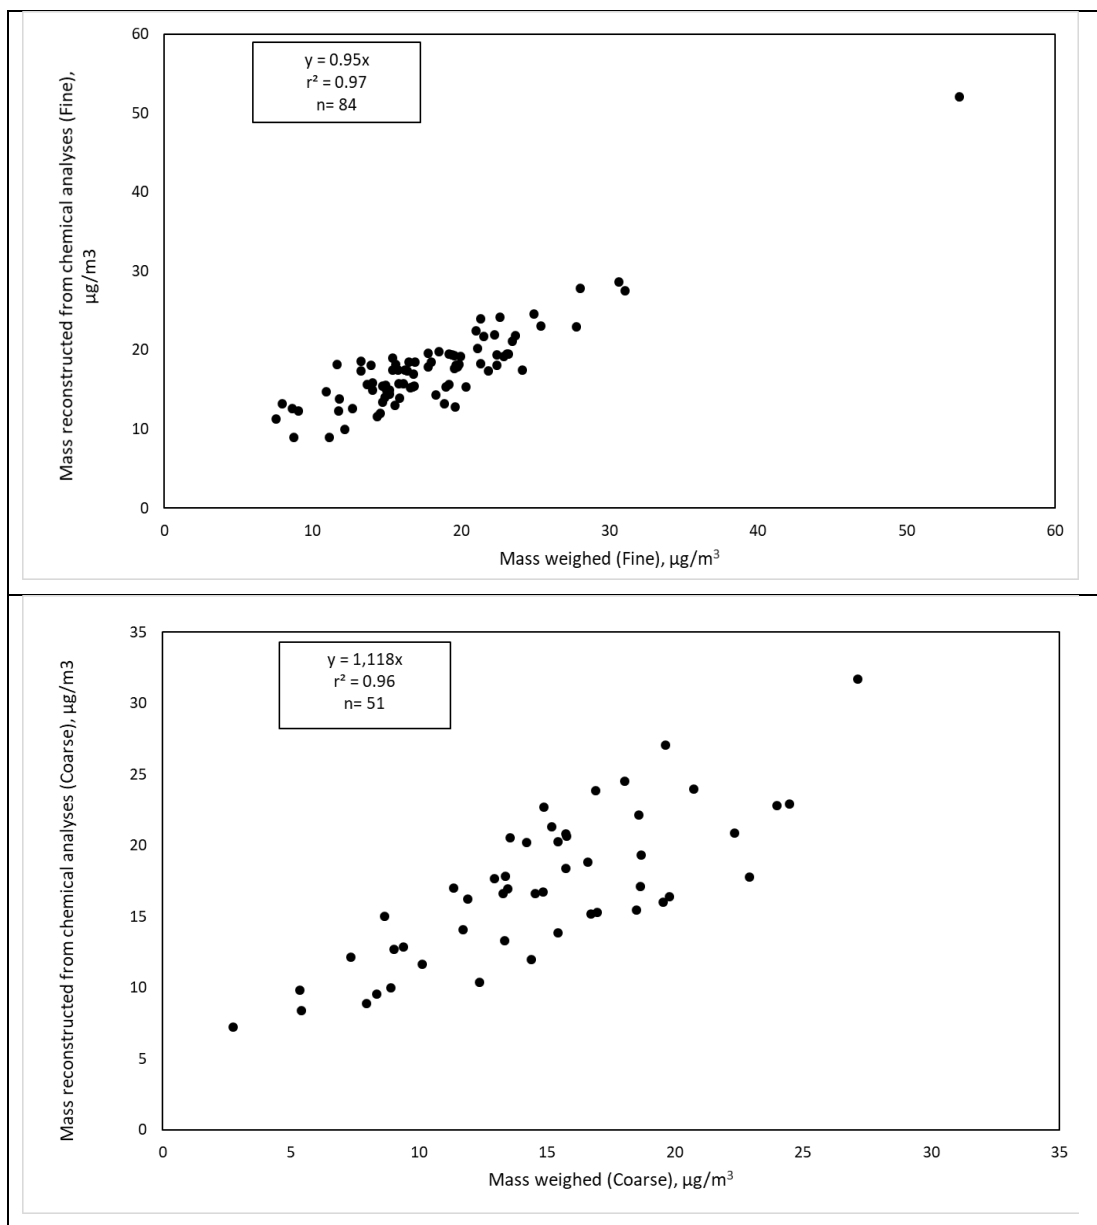

**Figure S2.** Consistency between the weighed and the reconstructed masses of the fine mode ( $k = 1.20$  and  $f = 0.229$ ) (upper panel), the coarse mode ( $k = 1.20$ ) where mineral dust was estimated with Malm et al. [42] method (bottom panel).

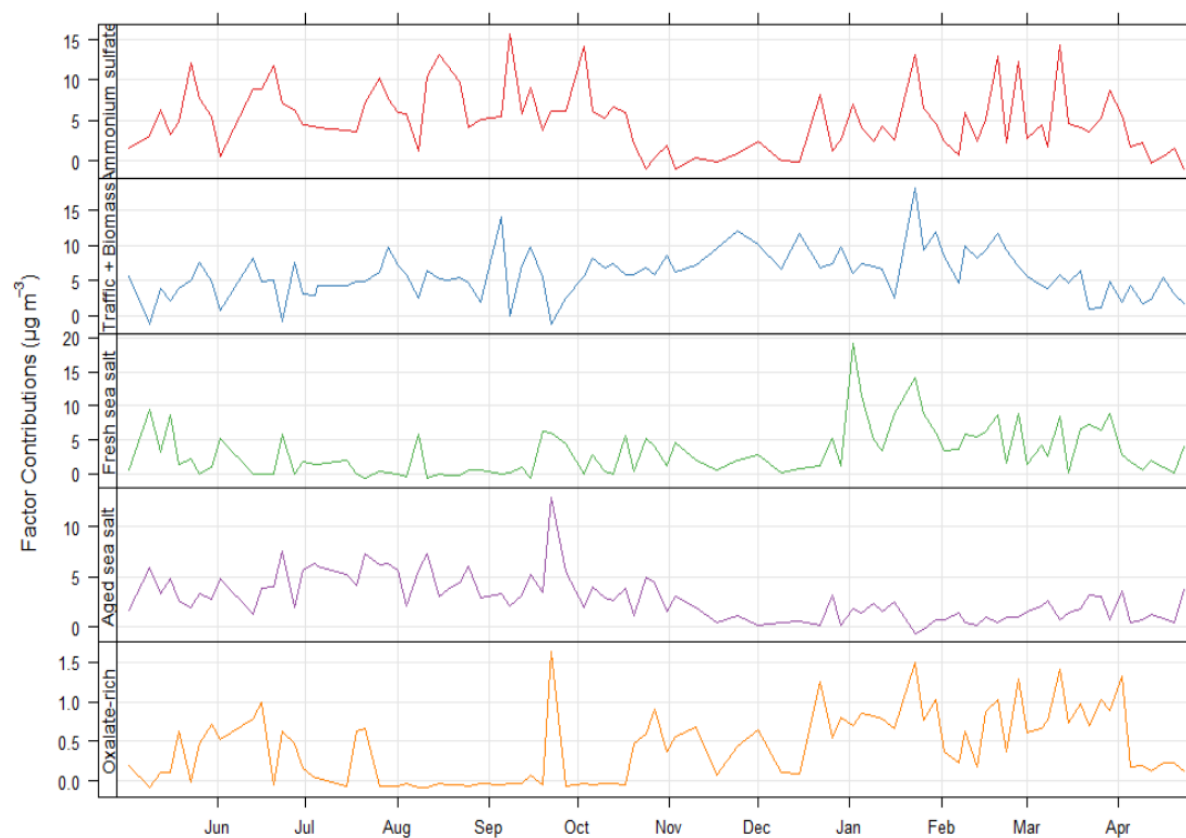

**Figure S3.** Temporal evolution of the identified PM sources contributed to  $\text{PM}_{2.5}$  levels during the study period.

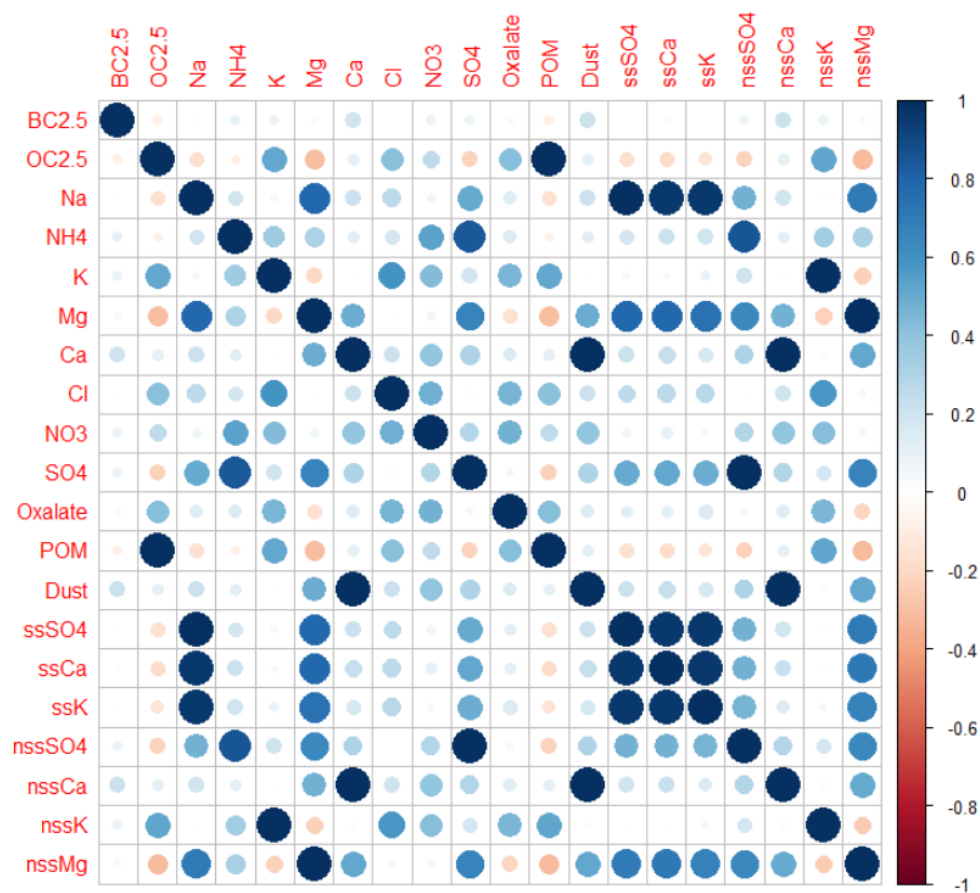

**Figure S4.** The correlation coefficients (r) between several source-indicating species in PM<sub>2.5</sub> in Tetouan.

**Table S1.** Summary of EPA PMF 5.0 settings and output diagnostics for receptor modeling of Tetouan PM<sub>2.5</sub>.

| Parameters                                             | PM <sub>2.5</sub>                                                                                                                                                                                                     |
|--------------------------------------------------------|-----------------------------------------------------------------------------------------------------------------------------------------------------------------------------------------------------------------------|
| <b>Settings</b>                                        |                                                                                                                                                                                                                       |
| N species                                              | 12                                                                                                                                                                                                                    |
| N samples                                              | 89                                                                                                                                                                                                                    |
| N factors                                              | 5                                                                                                                                                                                                                     |
| Treatment of missing data                              | No missing data                                                                                                                                                                                                       |
| Treatment of data below the detection limit (BDL)      | Data used as reported, no modification or censoring of BDL data                                                                                                                                                       |
| Treatment of concentrations equal to or less than zero | Data used as reported, no modification or censoring of data $\leq 0$                                                                                                                                                  |
| Extra modeling uncertainty                             | 20%                                                                                                                                                                                                                   |
| Robust mode                                            | Yes                                                                                                                                                                                                                   |
| Constraints                                            | None                                                                                                                                                                                                                  |
| Seed value                                             | Random                                                                                                                                                                                                                |
| N bootstraps in BS                                     | 400                                                                                                                                                                                                                   |
| r <sup>2</sup> for BS                                  | 0.6                                                                                                                                                                                                                   |
| DISP dQmax level                                       | 4, 8, 15, 25                                                                                                                                                                                                          |
| DISP active species                                    | All (BC specie was made weak)                                                                                                                                                                                         |
| N bootstraps; r <sup>2</sup> for BS in BS-DISP         | 100; 0.6                                                                                                                                                                                                              |
| BS-DISP active species                                 | OC, Na <sup>+</sup> , NH <sub>4</sub> <sup>+</sup> , K <sup>+</sup> , Mg <sup>2+</sup> , Cl <sup>-</sup> , NO <sub>3</sub> <sup>-</sup> , SO <sub>4</sub> <sup>2-</sup> , C <sub>2</sub> O <sub>4</sub> <sup>2-</sup> |
| BS-DISP dQmax                                          | 0.5, 1, 2, 4                                                                                                                                                                                                          |
| <b>Diagnostics</b>                                     |                                                                                                                                                                                                                       |
| Qtrue                                                  | 504                                                                                                                                                                                                                   |
| Qexpected                                              | 395                                                                                                                                                                                                                   |
| Qrobust                                                | 502                                                                                                                                                                                                                   |
| Qrobust/Qexpected                                      | 1.27                                                                                                                                                                                                                  |
| <b>DISP diagnostics:</b>                               |                                                                                                                                                                                                                       |
| Error code                                             | 0                                                                                                                                                                                                                     |
| Largest decrease in Q                                  | 0                                                                                                                                                                                                                     |
| DISP % dQ                                              | 0.0%                                                                                                                                                                                                                  |
| DISP swaps by factor                                   | 0                                                                                                                                                                                                                     |
| <b>BS-DISP Diagnostics:</b>                            |                                                                                                                                                                                                                       |
| BS mapping (Unmapped)                                  | 97% (3)                                                                                                                                                                                                               |
| BS-DISP % cases accepted                               | 81%                                                                                                                                                                                                                   |
| Largest Decrease in Q:                                 | -8.09                                                                                                                                                                                                                 |
| BS-DISP % dQ(Robust)                                   | -1.61                                                                                                                                                                                                                 |
| # of Decreases in Q                                    | 0                                                                                                                                                                                                                     |
| # of Swaps in Best Fit:                                | 5                                                                                                                                                                                                                     |
| # of Swaps in DISP:                                    | 71                                                                                                                                                                                                                    |

**Table S2.** Factor Profiles (concentration of species and % of species total) obtained from the PMF analysis for the PM<sub>2.5</sub> datasets.

| <b>Factor Profiles (conc. of species) from Base Run #3 (Convergent Run)</b> |                             |                                             |                           |                          |                         |
|-----------------------------------------------------------------------------|-----------------------------|---------------------------------------------|---------------------------|--------------------------|-------------------------|
| <b>Factor sources</b>                                                       |                             |                                             |                           |                          |                         |
| <b>conc. of species<br/>(<math>\mu\text{g}/\text{m}^3</math>)</b>           | <b>Ammonium<br/>sulfate</b> | <b>Road Traffic and Biomass<br/>Burning</b> | <b>Fresh Sea<br/>Salt</b> | <b>Aged Sea<br/>Salt</b> | <b>Oxalate<br/>rich</b> |
| <b>PM<sub>2.5</sub></b>                                                     | 5.17                        | 5.89                                        | 3.23                      | 2.89                     | 0.42                    |
| <b>BC</b>                                                                   | 0.13                        | 1.84                                        | 0.00                      | 0.76                     | 0.13                    |
| <b>OC</b>                                                                   | 0.00                        | 3.34                                        | 1.22                      | 0.19                     | 0.44                    |
| <b>Na<sup>+</sup></b>                                                       | 0.00                        | 0.00                                        | 0.06                      | 0.39                     | 0.05                    |
| <b>NH<sub>4</sub><sup>+</sup></b>                                           | 0.82                        | 0.00                                        | 0.12                      | 0.12                     | 0.00                    |
| <b>K<sup>+</sup></b>                                                        | 0.13                        | 0.07                                        | 0.13                      | 0.00                     | 0.05                    |
| <b>Mg<sup>2+</sup></b>                                                      | 0.02                        | 0.00                                        | 0.00                      | 0.07                     | 0.00                    |
| <b>Ca<sup>2+</sup></b>                                                      | 0.06                        | 0.07                                        | 0.01                      | 0.18                     | 0.02                    |
| <b>Cl<sup>-</sup></b>                                                       | 0.00                        | 0.00                                        | 0.34                      | 0.04                     | 0.00                    |
| <b>NO<sub>3</sub><sup>-</sup></b>                                           | 0.30                        | 0.00                                        | 0.28                      | 0.13                     | 0.21                    |
| <b>SO<sub>4</sub><sup>2-</sup></b>                                          | 1.78                        | 0.01                                        | 0.00                      | 1.06                     | 0.12                    |
| <b>Oxalate</b>                                                              | 0.00                        | 0.00                                        | 0.00                      | 0.01                     | 0.07                    |
| <b>Factor Profiles (% of species sum) from Base Run #3 (Convergent Run)</b> |                             |                                             |                           |                          |                         |
| <b>Factor sources</b>                                                       |                             |                                             |                           |                          |                         |
| <b>% of species sum</b>                                                     | <b>Ammonium<br/>sulfate</b> | <b>Road Traffic and Biomass<br/>Burning</b> | <b>Fresh Sea<br/>Salt</b> | <b>Aged Sea<br/>Salt</b> | <b>Oxalate<br/>rich</b> |
| <b>PM<sub>2.5</sub></b>                                                     | 29.36                       | 33.48                                       | 18.36                     | 16.41                    | 2.38                    |
| <b>BC</b>                                                                   | 4.68                        | 64.14                                       | 0.00                      | 26.52                    | 4.66                    |
| <b>OC</b>                                                                   | 0.00                        | 64.30                                       | 23.55                     | 3.72                     | 8.42                    |
| <b>Na<sup>+</sup></b>                                                       | 0.00                        | 0.00                                        | 11.78                     | 77.79                    | 10.43                   |
| <b>NH<sub>4</sub><sup>+</sup></b>                                           | 77.64                       | 0.00                                        | 11.41                     | 10.96                    | 0.00                    |
| <b>K<sup>+</sup></b>                                                        | 33.27                       | 19.16                                       | 33.49                     | 0.00                     | 14.08                   |
| <b>Mg<sup>2+</sup></b>                                                      | 18.33                       | 0.00                                        | 0.00                      | 81.67                    | 0.00                    |
| <b>Ca<sup>2+</sup></b>                                                      | 16.42                       | 21.48                                       | 2.28                      | 54.68                    | 5.13                    |
| <b>Cl<sup>-</sup></b>                                                       | 0.00                        | 0.00                                        | 88.97                     | 11.03                    | 0.00                    |
| <b>NO<sub>3</sub><sup>-</sup></b>                                           | 32.08                       | 0.32                                        | 30.67                     | 13.91                    | 23.03                   |
| <b>SO<sub>4</sub><sup>2-</sup></b>                                          | 59.94                       | 0.46                                        | 0.00                      | 35.62                    | 3.97                    |
| <b>Oxalate</b>                                                              | 0.00                        | 0.00                                        | 0.80                      | 7.54                     | 91.66                   |

**Table S3.** Monthly average of temperature (°C), precipitation (mm), wind speed (m/s), relative humidity (%), Boundary layer height (m), and ventilation coefficient (m/s<sup>2</sup>) derived from daily measurements at Tetouan city. Meteorological data records were retrieved from the weather station Sania-Ramel (35.58°N, 5.33°W) located in Tetouan, about 3.3 km from the sampling site (<http://www.tutiempo.net>, accessed in 2018). Boundary layer height (BLH) was estimated using the HYSPLIT™ model (Version 5.0) by running Meteorological Profile. The ventilation coefficient is defined as the product of boundary layer height and wind speed.

| <b>Month</b>    | <b>T (°C)</b> | <b>Precipitation (mm)</b> | <b>WS (m/s)</b> | <b>RH (%)</b> | <b>BLH (m)</b> | <b>VC (m/s<sup>2</sup>)</b> |
|-----------------|---------------|---------------------------|-----------------|---------------|----------------|-----------------------------|
| <b>May 2011</b> | 20.06         | 1.18                      | 4.30            | 76.55         | 439.42         | 1959.92                     |
| <b>Jun 2011</b> | 23.94         | 0.32                      | 3.66            | 67.78         | 390.41         | 997.56                      |
| <b>Jul 2011</b> | 24.88         | 0.00                      | 4.56            | 60.55         | 384.33         | 1887.33                     |
| <b>Aug 2011</b> | 26.11         | 0.08                      | 3.63            | 62.39         | 350.87         | 1313.56                     |
| <b>Sep 2011</b> | 23.89         | 0.27                      | 4.05            | 70.29         | 465.33         | 1847.15                     |
| <b>Oct 2011</b> | 21.19         | 0.95                      | 3.91            | 72.31         | 488.98         | 1981.77                     |
| <b>Nov 2011</b> | 16.68         | 3.86                      | 3.73            | 73.21         | 515.52         | 2039.41                     |
| <b>Dec 2011</b> | 14.42         | 0.36                      | 4.48            | 65.90         | 443.08         | 2107.03                     |
| <b>Jan 2012</b> | 13.18         | 1.82                      | 3.78            | 69.55         | 410.45         | 1588.44                     |
| <b>Feb 2012</b> | 12.20         | 0.71                      | 4.53            | 57.31         | 500.82         | 2091.42                     |
| <b>Mar 2012</b> | 15.39         | 0.45                      | 5.65            | 67.07         | 536.47         | 3039.74                     |
| <b>Apr 2012</b> | 16.97         | 1.74                      | 6.30            | 58.54         | 659.90         | 3838.40                     |
